# Supplementary material for: Meeting Sexual Partners Through Internet Sites and Smartphone Apps in Australia: National Representative Study
Source: PubMed Central journal article supplement (PMC6315227; doi:10.2196/10683), 2018-12-18
Supplement: jmir_v20i12e10683_app1.pdf [file jmir_v20i12e10683_app1.pdf]

**Multimedia Appendix 1.** Prevalence of looking for potential partners on websites or smartphone apps and prevalence of having sex with these partners among males.

| Characteristic                       |                                   | Searched for potential partner- ever | Searched for potential partner- last year | Met in person- last year | Had sex- last year      |
|--------------------------------------|-----------------------------------|--------------------------------------|-------------------------------------------|--------------------------|-------------------------|
|                                      |                                   | % <sup>a</sup> (95% CI)              | % <sup>a</sup> (95% CI)                   | % <sup>a</sup> (95% CI)  | % <sup>a</sup> (95% CI) |
| All participants <sup>b</sup>        |                                   |                                      |                                           |                          |                         |
| <b>Age group (years)</b>             |                                   |                                      |                                           |                          |                         |
|                                      | 16-29                             | 17.70 (14.68-21.18)                  | 11.11 (8.98-13.67)                        | 6.31 (4.82-8.23)         | 4.12 (3.07-5.52)        |
|                                      | 30-39                             | 18.40 (15.00-22.37)                  | 8.95 (6.73-11.79)                         | 4.68 (3.16-6.87)         | 2.93 (1.98-3.32)        |
|                                      | 40-49                             | 12.46 (10.15-15.20)                  | 6.06 (4.74-7.73)                          | 3.03 (2.24-4.08)         | 2.39 (1.71 -3.35)       |
|                                      | 50-59                             | 10.62 (8.52-13.17)                   | 4.66 (3.57-6.07)                          | 2.17 (1.48-3.15)         | 1.62 (1.06-2.47)        |
|                                      | 60-69                             | 5.39 (4.04-7.15)                     | 1.93 (1.39-2.67)                          | 1.04 (0.67-1.62)         | 0.69 (0.40-1.18)        |
| <b>Sexual identity</b>               |                                   |                                      |                                           |                          |                         |
|                                      | Heterosexual                      | 12.05 (10.79-13.43)                  | 5.96 (5.17-6.87)                          | 2.80 (2.28-3.44)         | 1.67 (1.33 -2.09)       |
|                                      | Homosexual or lesbian or bisexual | 57.99 (51.03-64.65)                  | 38.89 (32.47-45.73)                       | 31.59 (25.59-38.26)      | 28.82 (23.02-35.40)     |
| <b>Language spoken at home</b>       |                                   |                                      |                                           |                          |                         |
|                                      | English only                      | 13.41 (12.14-13.78)                  | 6.73 (5.95 -7.61)                         | 3.64 (3.11-4.27)         | 2.62 (2.20-3.11)        |
|                                      | Other                             | 15.29 (9.52 -23.66)                  | 11.47 (6.62 -18.5)                        | 4.94(1.92-12.16)         | 1.18 (0.37-3.75)        |
| <b>Annual household income</b>       |                                   |                                      |                                           |                          |                         |
|                                      | Very low or low                   | 12.67 (9.72-16.34)                   | 7.97 (5.54-11.33)                         | 4.28 (2.61-6.95)         | 2.41 (1.47-3.94)        |
|                                      | Middle                            | 12.54 (9.50-16.38)                   | 6.96 (5.08 -9.45)                         | 2.50 (1.65-3.77)         | 1.79 (1.10-2.89)        |
|                                      | High                              | 11.64 (8.87-15.14)                   | 3.25 (2.19-4.79)                          | 1.22 (0.74-2.01)         | 0.67 (0.34-1.32)        |
|                                      | Very high                         | 9.40 (7.26-12.10)                    | 3.51 (2.37-5.19)                          | 2.00 (1.16-3.43)         | 1.42 (0.94-2.12)        |
| <b>Area of residence<sup>c</sup></b> |                                   |                                      |                                           |                          |                         |
|                                      | Urban                             | 14.21 (12.61-15.98)                  | 7.06 (6.05-8.21)                          | 4.14 (3.39-5.05)         | 2.77 (2.26-3.39)        |
|                                      | Regional or remote                | 11.94 (10.05-14.14)                  | 6.93 (5.58-8.58)                          | 2.82 (2.14-3.72)         | 2.01 (1.44-2.80)        |
| <b>High alcohol consumption</b>      |                                   |                                      |                                           |                          |                         |
|                                      | No                                | 13.52 (12.08-15.09)                  | 6.93 (6.00-7.99)                          | 3.54 (2.95-4.25)         | 2.41 (1.99-2.91)        |
|                                      | Yes                               | 13.52 (11.05-16.45)                  | 7.29 (5.71-9.26)                          | 4.29 (3.01-6.07)         | 2.9 2(2.01-4.20)        |
| <b>Injected drugs in last year</b>   |                                   |                                      |                                           |                          |                         |
|                                      | No                                | 13.39 (12.11-14.78)                  | 6.88 (6.05-7.82)                          | 3.66 (3.09-4.34)         | 2.48 (2.08 -2.96)       |

|                                               |                     |                      |                      |                     |                      |
|-----------------------------------------------|---------------------|----------------------|----------------------|---------------------|----------------------|
|                                               | Yes                 | 18.00 (12.09-25.93)  | 11.41 (7.33-17.34)   | 5.50 (2.97-9.98)    | 4.40 (2.16-8.73)     |
| <b>Smoking status</b>                         |                     |                      |                      |                     |                      |
|                                               | Never smoked/former | 11.98 (10.64-13.5)   | 5.78 (4.96-6.73)     | 3.00 (2.46-3.64)    | 2.16 (1.75-2.65)     |
|                                               | Current smoker      | 19.87(16.68-23.49)   | 12.12 (9.81-14.88)   | 6.66 (4.93-8.93)    | 3.99 (2.91-5.46)     |
| <b>STI<sup>d</sup> testing in last year</b>   |                     |                      |                      |                     |                      |
|                                               | No test             | 10.06 (8.72-11.58)   | 4.25 (3.48-5.18)     | 2.04 (1.57-2.65)    | 1.49 (1.11-1.89)     |
|                                               | STI test            | 30.86 (25.63-36.63)  | 20.87 (16.74-25.71)  | 14.97 (11.49-19.28) | 11.04 (8.50-14.23)   |
|                                               | STI diagnosis       | 59.35 (40.22-76.01)  | 40.03 (23.85-58.71)  | 32.94 (18.95-50.80) | 30.09 (17.57-48.85)  |
| <b>Condom use with most recent partner</b>    |                     |                      |                      |                     |                      |
|                                               | Used condoms        | 16.61 (13.67-20.04)  | 11.4 (9.17 -14.11)   | 6.52 (5.02-8.43)    | 5.24 (3.92-6.99)     |
|                                               | Did not use         | 10.99(9.33-12.91)    | 3.81 (3.00 -4.84)    | 2.29 (1.68-3.12)    | 1.64 (1.22-2.20)     |
| <b>Number of sexual partners in last year</b> |                     |                      |                      |                     |                      |
|                                               | 1                   | 10.08 (8.79-11.54)   | 3.79 (3.06-4.69)     | 1.36 (0.93-1.98)    | 0.58 (0.36-0.93)     |
|                                               | 2-3                 | 35.37(31.07-39.92)   | 26.90 (22.96 -31.25) | 16.35 (13.13-20.19) | 11.85 ((9.12-15.24)  |
|                                               | >3                  | 41.21 (35.56 -47.10) | 34.01 (28.7 -39.76)  | 26.82 (21.98-32.33) | 23.32 (18.80 -28.55) |

<sup>a</sup>All proportions have been weighted to match the Australian population.

<sup>b</sup> n=9761 (3890)., weighted (unweighted) denominators.

<sup>c</sup>Accessibility/Remoteness Index of Australia.

<sup>d</sup>STI: sexually transmissible infection.
