# Supplementary material for: Meeting Sexual Partners Through Internet Sites and Smartphone Apps in Australia: National Representative Study
Source: PubMed Central journal article supplement (PMC6315227; doi:10.2196/10683), 2018-12-18
Supplement: jmir_v20i12e10683_app2.pdf [file jmir_v20i12e10683_app2.pdf]

**Multimedia Appendix 2.** Prevalence of looking for potential partners on websites or smartphone apps and prevalence of having sex with these partners among females.

| Characteristic                       |                                   | Searched for potential partner- ever | Searched for potential partner- last year | Met in person - last year | Had sex- last year      |
|--------------------------------------|-----------------------------------|--------------------------------------|-------------------------------------------|---------------------------|-------------------------|
|                                      |                                   | % <sup>a</sup> (95% CI)              | % <sup>a</sup> (95% CI)                   | % <sup>a</sup> (95% CI)   | % <sup>a</sup> (95% CI) |
| All participants <sup>b</sup>        |                                   |                                      |                                           |                           |                         |
| <b>Age group (years)</b>             |                                   |                                      |                                           |                           |                         |
|                                      | 16-29                             | 11.02 (8.56-14.09)                   | 5.81 (4.23-7.93)                          | 3.25 (2.41-4.37)          | 2.06 (1.43-2.96)        |
|                                      | 30-39                             | 13.50 (10.90-16.61)                  | 3.75 (2.79-5.02)                          | 2.51 (1.72-3.65)          | 1.61 (0.99-2.60)        |
|                                      | 40-49                             | 11.16 (9.01-13.74)                   | 3.39 (2.41-4.76)                          | 1.74 (1.11-2.73)          | 1.18 (0.64-2.15)        |
|                                      | 50-59                             | 9.37 (7.46-11.71)                    | 2.30 (1.42-3.71)                          | 1.81 (0.99-3.28)          | 0.84 (0.30-2.36)        |
|                                      | 60-69                             | 6.37 (4.72-8.55)                     | 1.75 (1.12-2.73)                          | 0.92 (0.44-1.92)          | 0.38 (0.08-1.76)        |
| <b>Sexual identity</b>               |                                   |                                      |                                           |                           |                         |
|                                      | Heterosexual                      | 9.88 (8.76-11.13)                    | 3.33 (2.74-4.03)                          | 1.99(1.61-2.45)           | 1.21 (0.91-.161)        |
|                                      | Homosexual or lesbian or bisexual | 29.93 (24.11-36.48)                  | 13.43 (9.61-8.46)                         | 8.14 (5.30-12.32)         | 4.77 (2.71-8.25)        |
| <b>Language spoken at home</b>       |                                   |                                      |                                           |                           |                         |
|                                      | English only                      | 10.73 (9.61-11.98)                   | 3.67 (3.10-4.35)                          | 2.27 (1.87-2.75)          | 1.37 (1.06-1.78)        |
|                                      | Other                             | 8.48 (3.71-18.24)                    | 4.89 (1.44-15.32)                         | 1.42 (0.53-3.37)          | 0.72 (0.15-3.30)        |
| <b>Annual household income</b>       |                                   |                                      |                                           |                           |                         |
|                                      | Very low or low                   | 11.28 (9.18-11.78)                   | 5.5 (4.13-7.29)                           | 3.79 (2.62-5.45)          | 2.58 (1.63-4.05)        |
|                                      | Middle                            | 8.52 (6.41-11.24)                    | 2.46 (1.66-3.63)                          | 1.37 (0.82-2.27)          | 0.52 (0.23-1.20)        |
|                                      | High                              | 7.43 (5.35-10.22)                    | 1.62 (0.69-3.74)                          | 0.66 (0.33-1.31)          | 0.44 (0.19-1.01)        |
|                                      | Very high                         | 10.24 (7.46-13.91)                   | 1.58 (0.89-2.78)                          | 1.00 (0.59-1.72)          | 0.49 (0.19-1.02)        |
| <b>Area of residence<sup>c</sup></b> |                                   |                                      |                                           |                           |                         |
|                                      | Urban                             | 11.62 (10.18-13.22)                  | 4.11 (3.33-5.06)                          | 2.59 (2.07-3.23)          | 1.48 (1.08-2.03)        |
|                                      | Regional or remote                | 8.51 (6.94-10.40)                    | 2.88 (2.15-3.86)                          | 1.42 (1.00-2.00)          | 1.02 (0.68-1.51)        |
| <b>High alcohol consumption</b>      |                                   |                                      |                                           |                           |                         |
|                                      | No                                | 11.23 (9.83-12.79)                   | 3.81 (3.07-4.72)                          | 2.15 (1.68-2.75)          | 1.22 (0.87-1.73)        |
|                                      | Yes                               | 9.57 (7.84-11.62)                    | 3.55 (2.67-4.72)                          | 2.36 (1.74-3.18)          | 1.58 (1.07-2.31)        |
| <b>Injected drugs in last year</b>   |                                   |                                      |                                           |                           |                         |
|                                      | No                                | 10.47 (9.35-11.71)                   | 3.63 (3.04-4.34)                          | 2.20 (1.81-2.67)          | 1.33 (1.02-1.73)        |
|                                      | Yes                               | 20.89(13.34-31.17)                   | 8.84 (5.14-14.79)                         | 3.89 (1.78-8.28)          | 2.28 (0.82-6.19)        |
| <b>Smoking status</b>                |                                   |                                      |                                           |                           |                         |

|                                               |                         |                         |                         |                         |                        |
|-----------------------------------------------|-------------------------|-------------------------|-------------------------|-------------------------|------------------------|
|                                               | Never smoked/<br>former | 10.18 (8.90-<br>11.62)  | 3.45 (2.77-4.28)        | 2.20 (1.76-<br>2.75)    | 1.41 (1.05-<br>1.88)   |
|                                               | Current smoker          | 12.76 (10.35-<br>15.64) | 5.12 (3.90-6.69)        | 2.57 (1.73-<br>3.79)    | 1.44 (0.87-<br>2.38)   |
| <b>STI<sup>d</sup> testing in last year</b>   |                         |                         |                         |                         |                        |
|                                               | No test                 | 8.07 (6.87-9.45)        | 2.24 (1.66-3.01)        | 1.32 (0.94-<br>1.85)    | 0.89 (0.58-<br>1.35)   |
|                                               | STI test                | 18.45 (14.06-<br>23.82) | 7.84 (5.45-11.16)       | 5.36 (3.86-<br>7.40)    | 4.34 (3.02-<br>6.21)   |
|                                               | STI diagnosis           | 25.86 (16.34-<br>38.37) | 19.04 (11.25-<br>30.39) | 15.26 (8.5-<br>25.88)   | 9.84 (4.86-<br>18.89)  |
| <b>Condom use with most recent partner</b>    |                         |                         |                         |                         |                        |
|                                               | Used condoms            | 12.2 (0.92-<br>16.05)   | 6.70 (4.83-9.22)        | 4.83 (3.35-<br>6.93)    | 3.60 (2.34-<br>5.48)   |
|                                               | Did not use             | 18.31 (13.54-<br>24.29) | 8.23 (5.47-12.44)       | 4.99 (3.45-<br>7.18)    | 3.49 (2.32-<br>5.24)   |
| <b>Number of sexual partners in last year</b> |                         |                         |                         |                         |                        |
|                                               | 1                       | 9.27 (8.15-<br>10.53)   | 2.36 (1.83-3.05)        | 1.05(0.76-<br>1.44)     | 0.37 (0.18-<br>0.74)   |
|                                               | 2-3                     | 31.47 (26.21-<br>27.25) | 22.96 (18.41-<br>28.25) | 17.86 (13.81-<br>22.77) | 13.39 (9.94-<br>17.79) |
|                                               | >3                      | 33.93 (24.66-<br>44.61) | 31.14 (22.29-<br>41.60) | 28.82 (20.20-<br>39.32) | 26.30 (18.2-<br>36.69) |

<sup>a</sup>All proportions have been weighted to match the Australian population.

<sup>b</sup> n=9637 (4294), weighted (unweighted) denominators.

<sup>c</sup>Accessibility/Remoteness Index of Australia.

<sup>d</sup>STI: sexually transmissible infection.
